# Supplementary material
Source: publisher site journal article supplement (https://www.spandidos-publications.com/3250/downloadSupplementary)
Supplement: Supplementary file 1 [file downloadSupplementary]

## Sheet: Sheet1
Table SI. Data from RNA-seq analysis.
GeneID	shCtrl_1	shCtrl_2	shCtrl_3	shBCAP31-1_1	shBCAP31-1_2	shBCAP31-1_3	shBCAP31-2_1	shBCAP31-2_2	shBCAP31-2_3
BAP31	7.85005	6.24722	8.70139	0.227415	0	0.137216	0.247835	0.210826	0.21842
CDH2	2.92538	3.84572	3.22334	0.192497	0.181898	0	0	0.199216	0.0816776
FLRT3	4.87896	6.24058	6.45198	0.491244	0.390398	0.448764	0.324466	0.371527	0.283246
CNTNAP2	17.3083	16.8158	18.1225	0.107658	0.125357	0.134398	0.48985	0.435173	0.390746
CDH1	0.273847	0.250892	0.324986	3.7888	4.45829	3.27512	3.4789	3.79863	3.00977
NREP	3.8865	4.46876	4.59882	0.466987	0.352407	0.408096	0.381156	0.505065	0.410155
ACKR3	0.390705	0.421766	0.363938	2.22322	2.00354	2.46597	2.32147	2.08305	2.58748
UBL4A	2.2291	2.38536	2.74582	0.593724	0.494684	0.519264	0.515999	0.465696	0.461538
NAA10	0.659133	0.558778	0.639382	3.00624	2.59545	3.45705	3.68675	3.02145	3.45506
ACKR3	0.441123	0.470222	0.413315	2.26947	2.52499	2.61097	1.77857	1.97994	1.60682
These datasets have not been submitted to a public database
